# Supplementary material
Source: PubMed Central journal article supplement (PMC9177677)
Supplement: 41467_2022_30862_MOESM1_ESM.pdf [file 41467_2022_30862_MOESM1_ESM.pdf]

# SUPPLEMENTARY INFORMATION

## **Rapid, adaptable and sensitive Cas13-based COVID-19 diagnostics using ADESSO**

Casati *et al.*

### **Table of content:**

|                             |             |
|-----------------------------|-------------|
| 1. Supplementary Figures    | pages 2-11  |
| 2. Supplementary Tables     | pages 12-33 |
| 3. Supplementary Methods    | pages 34-40 |
| 4. Supplementary References | page 41     |

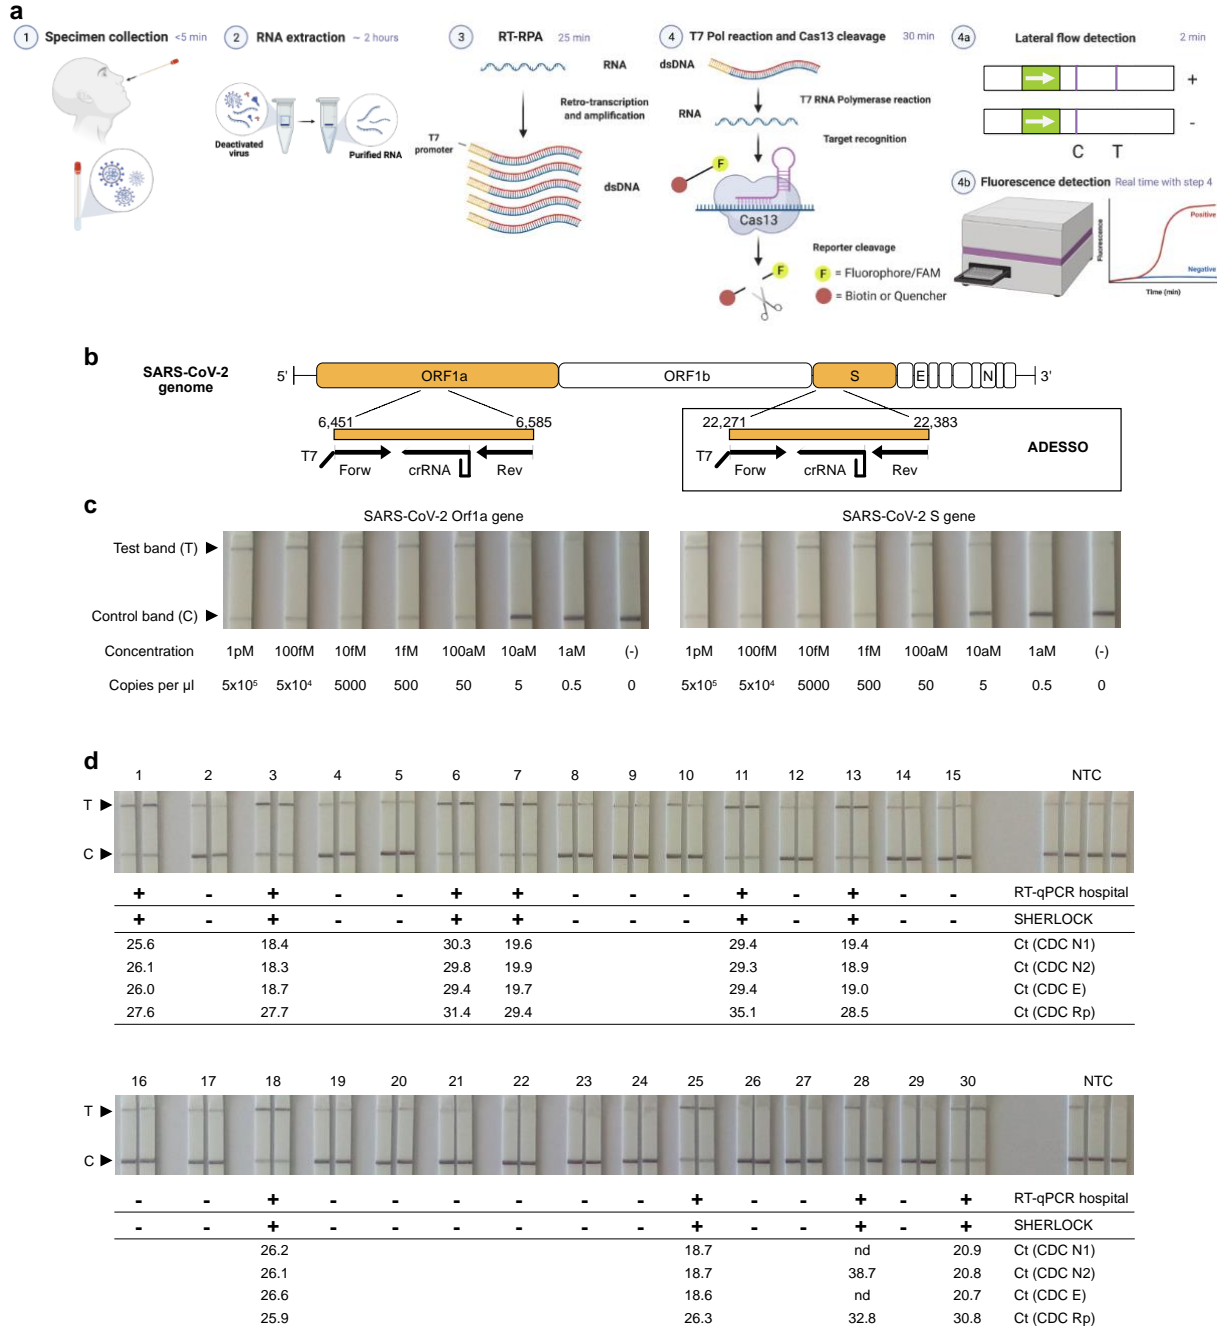

**Supplementary Fig. 1: First evaluation of SHERLOCK on clinical samples.** **a.** Graphic of SHERLOCK experimental workflow with lateral flow readout to detect SARS-CoV-2 in RNA extracted from clinical samples. **b.** Schematic of the SARS-CoV-2 genome and SHERLOCK assay locations. The regions targeted in panel **c** are highlighted in orange. Black arrows represent primers and crRNAs. Primers and crRNA targeting S were also used for ADESSO in the experiments shown in Figures 1, 2 and 3. T7 = T7 polymerase promoter; Forw = forward primer; Rev = reverse primer. **c.** SHERLOCK sensitivity on serial dilutions of an IVT fragment of SARS-CoV-2 S and Orf1a genes. **d.** Comparison of SARS-CoV-2 detection on RNA extracted from 30 clinical samples via SHERLOCK and RT-qPCR (Medical University Hospital Mannheim (RT-

qPCR hospital) or CDC 2019-nCoV Real-Time RT-PCR Diagnostic Panel). SHERLOCK was performed on SARS-CoV-2 S gene; RT-qPCR at the Medical University Hospital Mannheim was performed on SARS-CoV-2 E and Orf1a genes; CDC RT-qPCR was performed on SARS-CoV-2 N1, N2 and E genes (CDC N1, N2, E) and human RNase P (CDC Rp) as RNA quality control. T = test band; C = control band; nd = not detected; NTC = non template control.

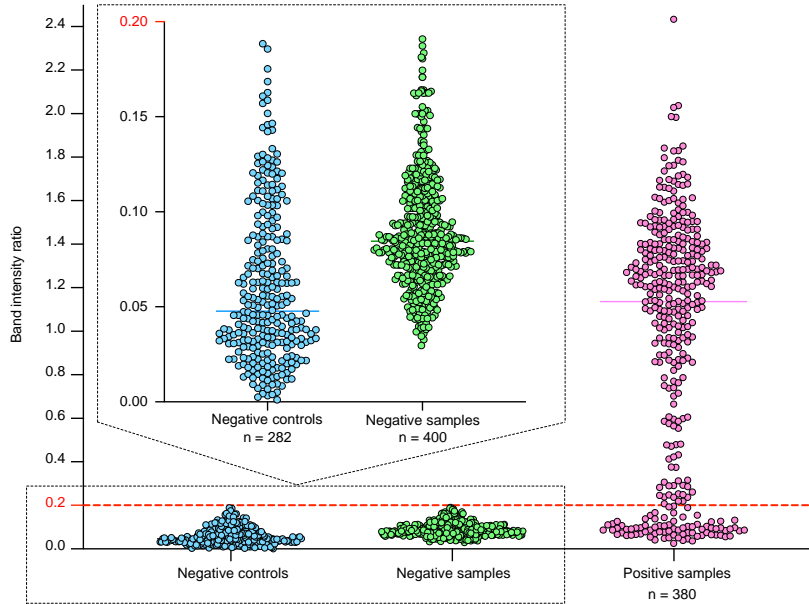

**Supplementary Fig. 2: SARS-CoV-2 clinical samples. Definition of threshold between positive and negative results.** The bar plot shows the band intensity ratios of all the negative controls utilized in this study (282, in blue) together with the negative (100 samples x 2 sampling methods (swab and gargle) x 2 tests (direct ADESSO and ADESSO on RNA) = 400, in green) and positive (95 samples x 2 sampling methods (swab and gargle) x 2 tests (direct ADESSO and ADESSO on RNA) = 380, in pink) clinical samples analyzed in Fig. 2. These data were used to define a threshold band intensity ratio of 0.2 to distinguish between positive and negative samples. The horizontal lines represent the median of the band intensity ratios among all the samples belonging to each category.

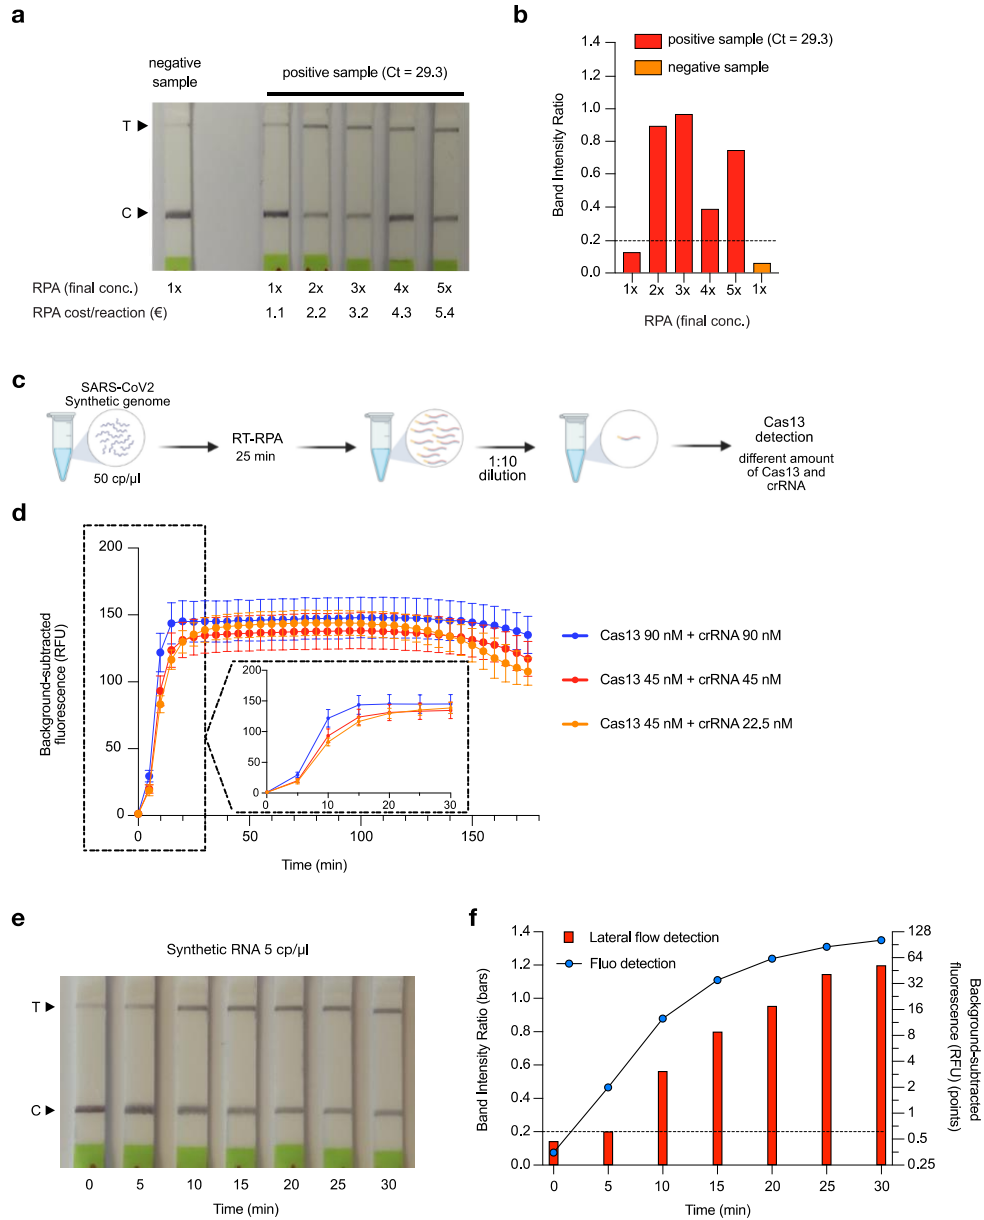

**Supplementary Fig. 3: ADESSO: an optimized and highly sensitive SHERLOCK assay. a.** Optimization of direct SHERLOCK sensitivity with lateral flow readout by increasing the RPA reagents to detect a false negative sample (Sample #11 in Supplementary Fig. 1, Supplementary Table 1). A true negative sample (Sample #10 in Supplementary Fig. 1, Supplementary Table 1) is used as negative control. The RPA cost per reaction for different RPA concentrations is also indicated (rounded values). For the precise values see Supplementary Table 5. **b.** Intensity ratios of the lateral flow strips in **a** are shown as a bar plot. **c.** Scheme of the experiment for the optimization of the Cas13 reaction kinetics with fluorescence readout using different amounts of Cas13 protein and crRNA. **d.** 3-hour analysis of the fluorescence signal at different time-points of the experiment depicted in **c**. The enlarged window shows the first 30 minutes of the reaction. **e.** Time-point analysis of the Cas13 reaction to determine the shortest incubation time required to detect a positive signal with lateral flow readout. **f.** Intensity ratios of the lateral flow strips in **e** are

shown in a bar plot. For panels **a** and **e**: T = test band; C = control band. For panel **d**: the bullets represent the mean of 4 technical replicates and the error bars represent the standard deviation. For panel **f**: the bullets represent the mean of 4 technical replicates.

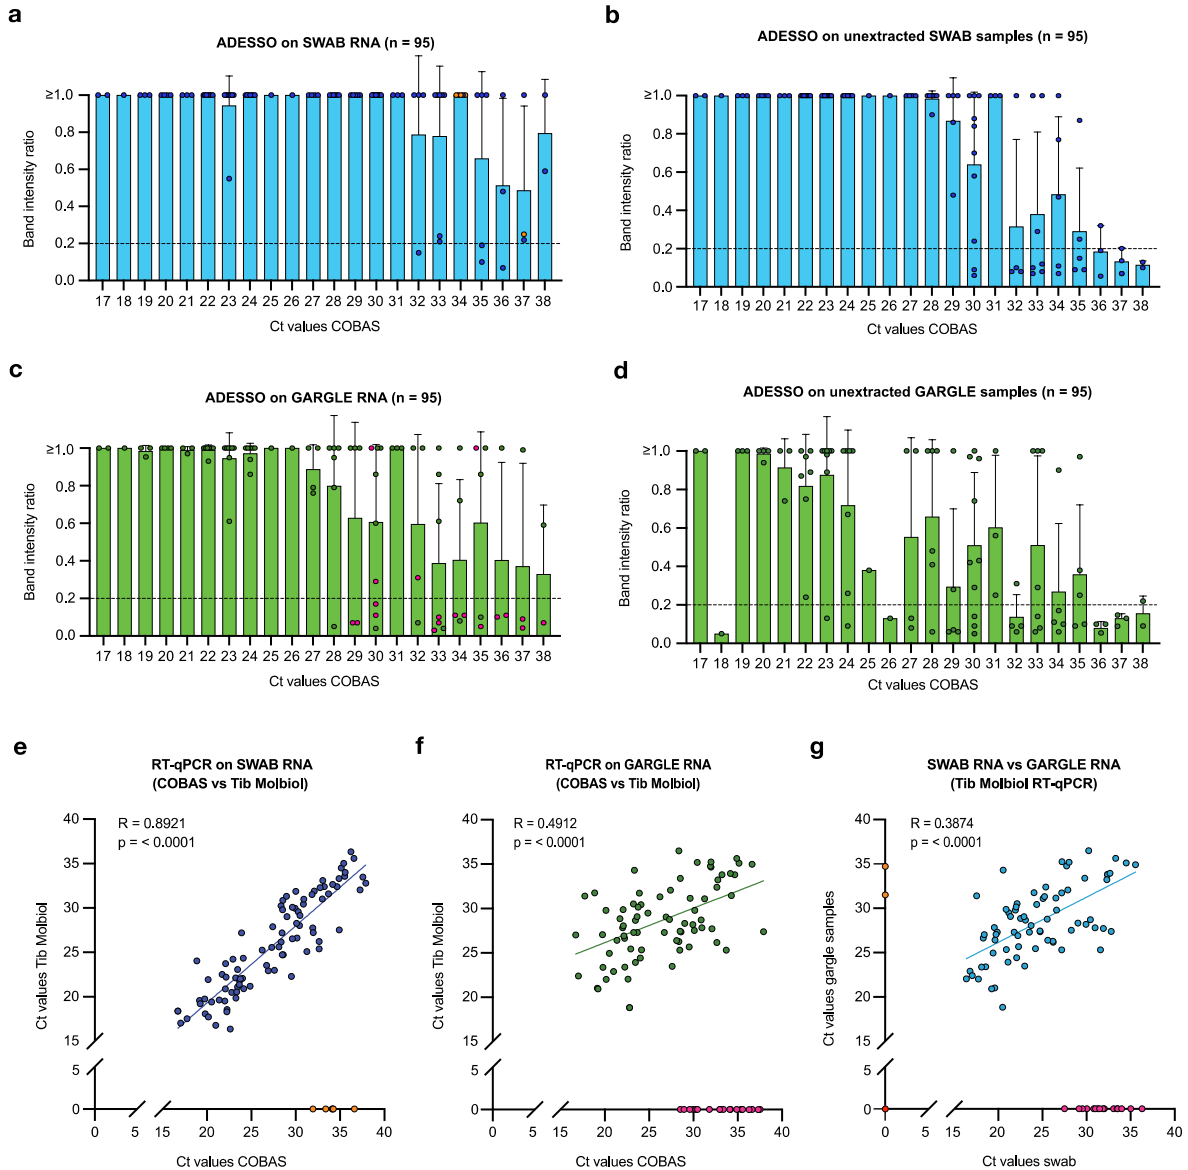

**Supplementary Fig. 4: Evaluation of ADESSO performance on clinical samples in direct comparison to RT-qPCR.** **a.** ADESSO performance on RNA extracted from swab specimens in comparison with COBAS RT-qPCR. Negative samples by Tib Molbiol RT-qPCR are represented in orange. **b.** ADESSO performance on unextracted swab specimens in comparison with COBAS RT-qPCR (performed on RNA extracted from swabs). **c.** ADESSO performance on RNA extracted from gargle samples in comparison with COBAS RT-qPCR (performed on RNA extracted from swabs). Negative samples by Tib Molbiol RT-qPCR are represented in pink. **d.** ADESSO performance on unextracted gargle samples in comparison with COBAS RT-qPCR (performed on RNA extracted from swabs). **e.** Pearson correlation (R) analysis for Ct values obtained with Tib Molbiol RT-qPCR (y axis) or COBAS RT-qPCR (x axis) on RNA extracted from swab specimens. Negative samples by Tib Molbiol RT-qPCR are represented in orange and are excluded in the calculation of the correlation (R). **f.** Pearson correlation analysis of Ct values obtained with Tib Molbiol RT-qPCR (y axis) and COBAS RT-qPCR (x axis) on RNA extracted

from gargle samples. Negative samples by Tib Molbiol RT-qPCR are represented in pink and are excluded in the calculation of the correlation (R). **g.** Pearson correlation analysis of Ct values obtained after Tib Molbiol RT-qPCR on RNA extracted from gargle (y axis) and swab (x axis) samples. Negative swab samples are represented in orange; negative gargle samples are represented in pink; negative samples both as gargle and swab are represented in red. All the negative samples are excluded from the calculation of the correlation (R). For all the Pearson correlation (R) analysis a two-tailed p-value was calculated. In panels **a-d** only the band intensity ratios of the positive samples are shown (n = 95). Values higher than 1 are plotted as equal to 1 for better visualization. Ct values are rounded to the nearest whole number for the sake of visualization. The exact Ct values are listed in Supplementary Table 2. For panels **a, b, c** and **d**: the bars represent the mean Ct value among all the clinical samples belonging to each category of Ct value and the error bars represent the positive standard deviation.



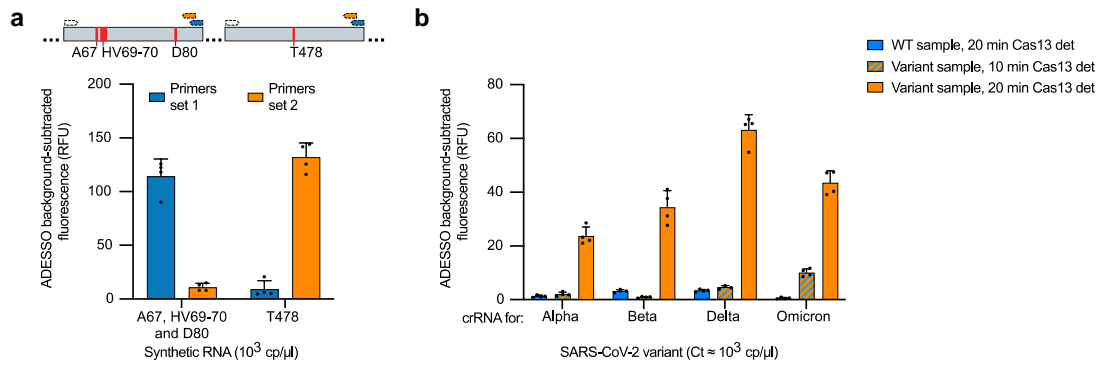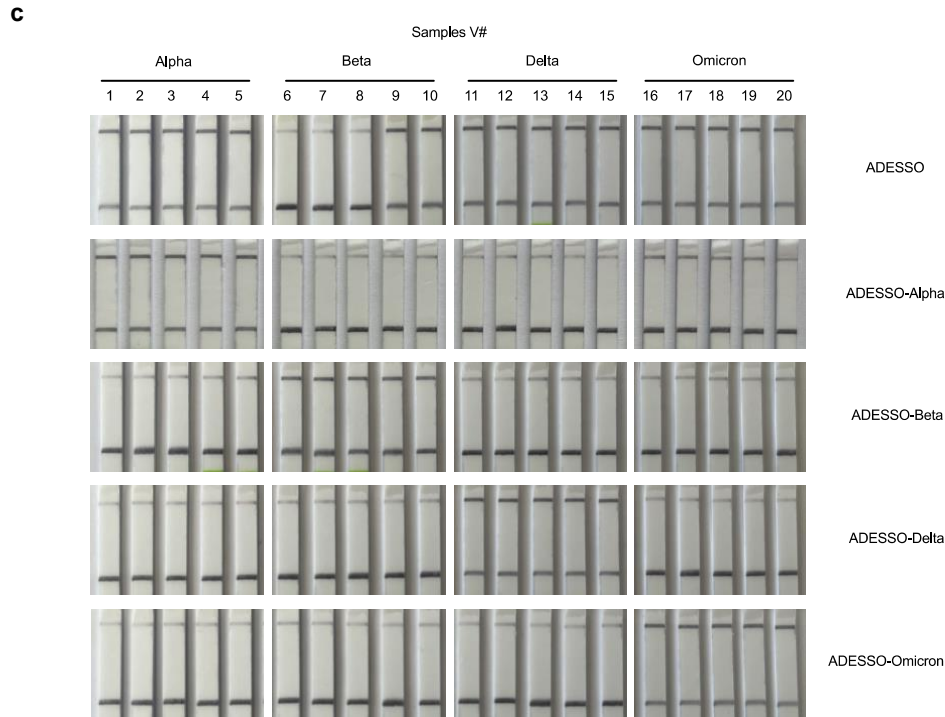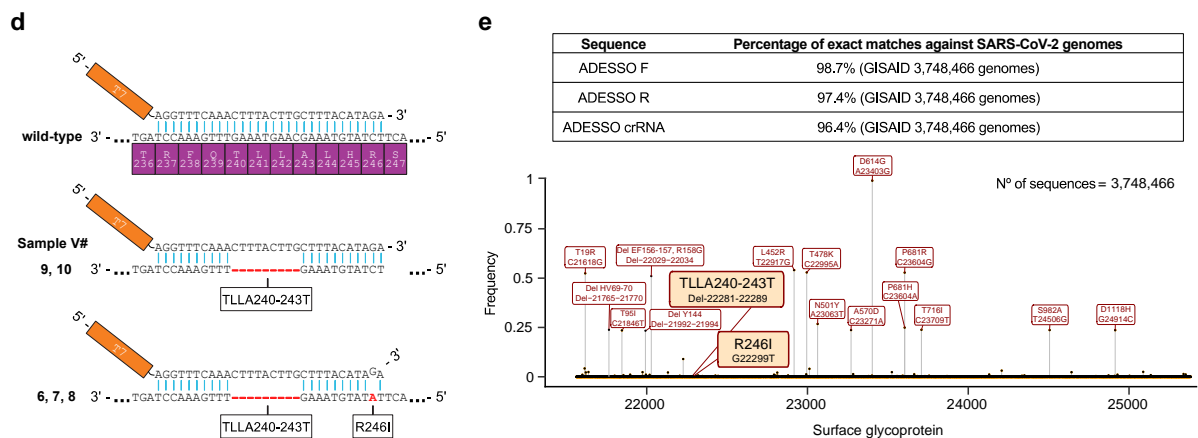

**Supplementary Fig. 5: Adaptation of ADESSO for detection of SARS-CoV-2 variants.** **a.** RT-RPA primers optimization to amplify the region of SARS-CoV-2 S gene containing mutations at A67, HV69-70 and D80 or T478. Two combinations of the same forward primer (white arrow) with two alternative reverse primers were tested (reverse 1 in blue and reverse 2 in orange) on a  $10^3$

cp/μl dilution of SARS-CoV-2 synthetic genome (wild-type sequence). Cas13 detection was performed using crRNAs specific for HV69-70 and T478. Bars represent the mean of 4 technical replicates and the error bars represent the standard deviation. **b.** ADESSO fluorescence using specific crRNAs for the detection of different variants. Clinical samples carrying the WT virus or specific variant with a Ct value corresponding to  $10^3$  cp/μl were used as targets. **c.** Variant specific ADESSO tests on 20 clinical samples carrying different variants. The band intensity ratios of the sticks depicted here are shown in Fig. 3b. **d.** Schematic of the binding of the forward RPA primer used in ADESSO to the complementary region in the original SARS-CoV-2 sequence (top) and in Beta samples V#6-10. Samples V#9-10 carry the deletion  $\Delta 242-244$  only (middle), while samples V#6-8 have an additional mutation (R246I) (bottom). The positions of the  $\Delta 242-244$  deletion and the R246I mutation are highlighted in gray. The mutations causing amino acid changes are marked in red. **e.** Bioinformatic analysis showing the percentage of exact target matches for RT-RPA primers and crRNA used for ADESSO (top) and the mutation frequency for each position in the S gene (bottom). Mutations leading to  $\Delta 242-244$  and R246I are highlighted. For panels **a** and **b**: bars represent the mean of  $n = 4$  technical replicates and error bars represent the positive standard deviation.

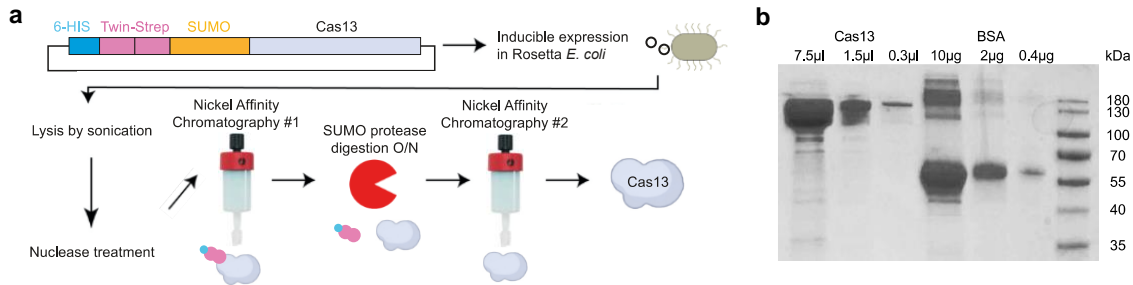

**Supplementary Fig. 6: Generation of LwaCas13a.** **a.** LwaCas13a protein purification. The LwaCas13 fusion construct also encodes multiple affinity tags and a protease recognition site at the N terminus of the polypeptide. We have utilized the 6xHIS tag as the basis for our relatively inexpensive purification, while others have developed an alternative protocol based on the Strep-tags<sup>1</sup>. After expression in Rosetta cells (inducible via the Lac operon), the cells are lysed by sonication and the nucleic acid contained within the lysate is digested. The fusion protein is then purified by nickel-affinity chromatography. The purified fusion protein is digested with SUMO protease, which cleaves the tags and majority of the SUMO sites off of the mature protein. The SUMO protease and in-tact affinity tags are then removed from the sample by re-applying the sample to the nickel column, leaving >98% pure Cas13. We also employ a size exclusion chromatography step to remove any aggregated Cas13 protein (not pictured). **b.** Serially diluted amounts of pure Cas13 were analyzed by coomassie staining after conventional SDS-PAGE, revealing a prominent band at the appropriate molecular weight and only minor contaminants. A serial dilution of BSA was also run as an estimate of protein concentration by densitometry (which was also validated by BCA assay). Two different high-yielding purifications were used to generate the results present throughout this study, both of which yielded proteins that had comparable levels of activity.

| Sample ID | CDC N1 (Ct) | CDC N2 (Ct) | CDC E (Ct) | CDC Rp (Ct) | SHERLOCK | Notes                   |
|-----------|-------------|-------------|------------|-------------|----------|-------------------------|
| 1         | 25.6        | 26.1        | 26         | 27.6        | +        |                         |
| 2         | nd          | nd          | nd         | nd          | -        |                         |
| 3         | 18.4        | 18.3        | 18.7       | 27.7        | +        |                         |
| 4         | nd          | nd          | nd         | nd          | -        |                         |
| 5         | nd          | nd          | nd         | nd          | -        |                         |
| 6         | 30.3        | 29.8        | 29.4       | 31.4        | +        |                         |
| 7         | 19.6        | 19.9        | 19.7       | 29.4        | +        |                         |
| 8         | nd          | nd          | nd         | nd          | -        |                         |
| 9         | nd          | nd          | nd         | nd          | -        |                         |
| 10        | nd          | nd          | nd         | nd          | -        | Sample used also in S3a |
| 11        | 29.4        | 29.3        | 29.4       | 35.1        | +        | Sample used also in S3a |
| 12        | nd          | nd          | nd         | nd          | -        |                         |
| 13        | 19.4        | 18.9        | 19         | 28.5        | +        |                         |
| 14        | nd          | nd          | nd         | nd          | -        |                         |
| 15        | nd          | nd          | nd         | nd          | -        |                         |
| 16        | nd          | nd          | nd         | nd          | -        |                         |
| 17        | nd          | nd          | nd         | nd          | -        |                         |
| 18        | 26.2        | 26.1        | 26.6       | 25.9        | +        |                         |
| 19        | nd          | nd          | nd         | nd          | -        |                         |
| 20        | nd          | nd          | nd         | nd          | -        |                         |
| 21        | nd          | nd          | nd         | nd          | -        |                         |
| 22        | nd          | nd          | nd         | nd          | -        |                         |
| 23        | nd          | nd          | nd         | nd          | -        |                         |
| 24        | nd          | nd          | nd         | nd          | -        |                         |
| 25        | 18.7        | 18.7        | 18.6       | 26.3        | +        |                         |

|    |      |      |      |      |   |  |
|----|------|------|------|------|---|--|
| 26 | nd   | nd   | nd   | nd   | - |  |
| 27 | nd   | nd   | nd   | nd   | - |  |
| 28 | nd   | 38.7 | nd   | 32.8 | + |  |
| 29 | nd   | nd   | nd   | nd   | - |  |
| 30 | 20.9 | 20.8 | 20.7 | 30.8 | + |  |

**Supplementary Table 1: Clinical information of samples used in Supplementary Fig. 1.**

+ = positive test; - = negative test; nd = not detected.

|           | SWAB       |                  |        |               |              | GARGLE WATER     |        |               |              |  |
|-----------|------------|------------------|--------|---------------|--------------|------------------|--------|---------------|--------------|--|
|           | RNA        |                  |        | Lysate        |              | RNA              |        | Lysate        |              |  |
| Sample ID | COBAS (Ct) | Tib MolBiol (Ct) | ADESSO | direct ADESSO | Antigen test | Tib MolBiol (Ct) | ADESSO | direct ADESSO | Antigen test |  |
| 316       | 35.15      | 34.5             | 1.53   | 0.09          | -            | 35.1             | 0.10   | 0.10          | -            |  |
| 327       | 21.72      | 22.53            | 1.59   | 1.69          | +            | 28.85            | 1.27   | 0.24          | -            |  |
| 329       | 23.46      | 23.07            | 1.42   | 2.03          | +            | 28.66            | 1.20   | 1.47          | -            |  |
| 339       | 31.98      | nd               | 0.82   | 0.07          | -            | 34.68            | 0.60   | 0.11          | -            |  |
| 345       | 28.55      | 30.84            | 2.43   | 1.09          | -            | nd               | 0.07   | 0.06          | -            |  |
| 359       | 29.93      | 29.96            | 1.41   | 0.84          | -            | 28.18            | 0.99   | 0.96          | -            |  |
| 363       | 28.62      | 24.74            | 1.61   | 0.86          | +            | 27.37            | 1.40   | 0.28          | -            |  |
| 376       | 22.63      | 16.38            | 1.25   | 1.84          | +            | 22.04            | 0.95   | 1.11          | -            |  |
| 409       | 28.49      | 24.73            | 2.04   | 1.30          | -            | 27.44            | 0.95   | 1.13          | -            |  |
| 414       | 22.28      | 18.57            | 1.98   | 1.76          | +            | 23.39            | 0.93   | 0.89          | -            |  |
| 417       | 22.03      | 19.54            | 1.37   | 1.67          | +            | 27.84            | 1.02   | 0.87          | -            |  |
| 436       | 34.9       | 33.32            | 0.10   | 0.09          | -            | 35.63            | 0.86   | 0.25          | -            |  |
| 437       | 27.61      | 23               | 1.62   | 1.67          | +            | 23.49            | 0.79   | 1.50          | -            |  |
| 461       | 32.64      | 26.23            | 1.41   | 0.29          | -            | 26.17            | 0.86   | 1.19          | -            |  |
| 463       | 35.42      | 35.04            | 1.48   | 0.15          | -            | nd               | 0.05   | 0.38          | -            |  |
| 464       | 31.92      | 27.74            | 1.66   | 0.08          | -            | 34.78            | 0.07   | 0.31          | -            |  |
| 470       | 37.35      | 32.03            | 0.22   | 0.20          | -            | nd               | 0.04   | 0.15          | -            |  |
| 530       | 33.07      | 33.08            | 0.21   | 0.07          | -            | nd               | 0.03   | 1.02          | -            |  |
| 535       | 30.43      | 28.02            | 1.53   | 1.54          | -            | 35.2             | 0.04   | 0.05          | -            |  |
| 536       | 28.97      | 31.31            | 1.38   | 1.38          | -            | nd               | 0.07   | 0.06          | -            |  |
| 539       | 24.09      | 24.35            | 1.64   | 1.51          | -            | 30.43            | 0.86   | 0.67          | -            |  |
| 546       | 33.22      | 32.4             | 1.61   | 0.12          | -            | 33.82            | 0.04   | 0.06          | -            |  |
| 549       | 28.35      | 30.24            | 1.66   | 1.71          | -            | 36.49            | 0.05   | 0.06          | -            |  |
| 564       | 34.66      | 32.39            | 0.19   | 0.25          | -            | 33.82            | 1.26   | 0.97          | -            |  |

|     |       |       |      |      |   |       |      |      |   |
|-----|-------|-------|------|------|---|-------|------|------|---|
| 602 | 32.1  | 31.91 | 0.15 | 1.28 | - | 27.71 | 1.09 | 0.09 | - |
| 622 | 28.47 | 27.2  | 1.85 | 1.36 | + | 25.32 | 1.23 | 1.43 | - |
| 624 | 36.64 | 35.56 | 1.11 | 0.14 | - | 34.93 | 0.97 | 0.09 | - |
| 625 | 28.36 | 26.18 | 1.38 | 1.55 | - | 26.28 | 1.23 | 0.41 | - |
| 661 | 23.45 | 21.1  | 1.59 | 1.71 | + | 23.93 | 1.28 | 1.83 | - |
| 666 | 34.18 | 32.66 | 1.30 | 0.47 | - | 33.95 | 0.72 | 0.17 | - |
| 677 | 19.8  | 18.1  | 1.83 | 1.46 | + | 23.38 | 1.33 | 1.58 | - |
| 679 | 37.57 | 33.47 | 1.30 | 0.13 | - | nd    | 0.07 | 0.09 | - |
| 703 | 23.23 | 22.14 | 1.72 | 1.80 | + | 30.53 | 1.01 | 0.13 | - |
| 704 | 35.52 | 33.56 | 0.48 | 0.19 | - | nd    | 0.11 | 0.10 | - |
| 717 | 26.92 | 22.92 | 1.51 | 1.61 | + | 29.06 | 0.79 | 1.74 | - |
| 727 | 23.69 | 21.81 | 1.69 | 1.99 | + | 27.31 | 1.37 | 0.26 | - |
| 734 | 33.71 | 31.59 | 1.44 | 0.77 | - | 25.32 | 0.08 | 0.90 | - |
| 735 | 24.14 | 20.9  | 1.70 | 1.19 | + | 25.33 | 1.15 | 1.28 | - |
| 738 | 22.8  | 20.5  | 1.55 | 1.10 | + | 18.84 | 1.02 | 0.98 | + |
| 740 | 22.25 | 18.3  | 1.66 | 1.09 | + | 26.65 | 1.02 | 0.97 | - |
| 741 | 20.53 | 19.41 | 1.53 | 1.09 | + | 24.94 | 1.04 | 0.74 | - |
| 748 | 30.01 | 31.88 | 1.43 | 0.70 | - | nd    | 0.17 | 0.09 | - |
| 757 | 30.1  | 28.28 | 1.51 | 0.58 | + | 27.52 | 0.86 | 0.97 | - |
| 769 | 31.99 | 27.22 | 1.47 | 0.08 | - | 35.26 | 1.25 | 0.06 | - |
| 812 | 28.1  | 25.62 | 1.21 | 0.90 | + | 26.39 | 1.07 | 0.48 | - |
| 814 | 30.17 | 26.62 | 1.13 | 0.88 | - | 29.81 | 0.60 | 0.43 | - |
| 835 | 27.3  | 25.55 | 1.14 | 1.48 | + | 28.77 | 0.76 | 0.13 | - |
| 845 | 37.91 | 32.8  | 0.59 | 0.10 | - | 27.4  | 0.59 | 0.22 | - |
| 850 | 24.86 | 21.2  | 1.27 | 1.68 | + | 29.48 | 1.51 | 0.38 | - |
| 859 | 34.93 | 27.52 | 1.23 | 0.87 | - | nd    | 1.48 | 0.09 | - |
| 902 | 32.64 | 25.4  | 1.40 | 1.32 | - | 32.39 | 0.61 | 0.29 | - |

|      |       |       |      |      |   |       |      |      |   |
|------|-------|-------|------|------|---|-------|------|------|---|
| 904  | 23.36 | 20.56 | 1.41 | 1.79 | + | 34.32 | 0.61 | 0.89 | - |
| 909  | 29.53 | 22.29 | 1.40 | 1.41 | + | 25.68 | 1.61 | 1.27 | - |
| 2001 | 33.42 | nd    | 1.29 | 0.08 | - | nd    | 0.10 | 0.08 | - |
| 2004 | 19.18 | 19.59 | 1.26 | 1.55 | + | 21.03 | 1.14 | 1.32 | + |
| 2007 | 17.76 | 17.54 | 1.41 | 1.51 | + | 31.41 | 1.28 | 0.05 | - |
| 2023 | 31.26 | 25.09 | 1.28 | 1.54 | - | 31.11 | 1.35 | 0.25 | - |
| 2037 | 22.08 | 20.88 | 1.50 | 1.78 | + | 29.88 | 1.25 | 0.75 | - |
| 2048 | 26.72 | 23.53 | 1.07 | 1.38 | + | 27.32 | 1.35 | 1.04 | - |
| 2057 | 24    | 22.08 | 1.33 | 1.37 | + | 24.44 | 1.76 | 1.10 | - |
| 2059 | 34.24 | nd    | 1.27 | 0.07 | - | nd    | 0.11 | 0.06 | - |
| 2064 | 20.99 | 16.78 | 1.32 | 1.37 | + | 22.9  | 1.13 | 1.13 | - |
| 2068 | 20.13 | 21.93 | 1.27 | 1.22 | + | 29.8  | 1.33 | 0.94 | - |
| 2071 | 20.17 | 17.74 | 1.26 | 1.48 | + | 22.02 | 1.07 | 1.50 | + |
| 3000 | 28.53 | 29.81 | 1.37 | 0.48 | - | 33.41 | 1.17 | 0.07 | - |
| 3005 | 17.04 | 17.04 | 1.50 | 1.48 | + | 22.41 | 1.04 | 1.32 | + |
| 3009 | 26.24 | 25.26 | 1.28 | 1.17 | + | 31.31 | 1.09 | 0.13 | - |
| 3010 | 16.72 | 18.4  | 1.22 | 1.26 | + | 27.03 | 1.05 | 1.34 | - |
| 3011 | 23.75 | 22.02 | 1.36 | 1.40 | + | 30.15 | 1.12 | 1.29 | - |
| 3013 | 23.26 | 19.87 | 1.30 | 1.47 | + | 27.32 | 1.06 | 1.14 | - |
| 3019 | 21.38 | 19.64 | 1.56 | 1.36 | + | 26.41 | 0.97 | 1.22 | - |
| 3027 | 33    | 31.02 | 0.24 | 1.50 | - | nd    | 0.07 | 0.14 | - |
| 4000 | 23.66 | 21.37 | 1.10 | 1.44 | + | 29.09 | 0.94 | 1.26 | - |
| G2   | 36.32 | 36.32 | 0.06 | 0.06 | - | nd    | 0.10 | 0.05 | - |
| G3   | 30.97 | 30.97 | 1.20 | 1.26 | - | 27.8  | 1.20 | 1.11 | - |
| G4   | 19.23 | 19.23 | 1.20 | 1.21 | + | 20.92 | 0.95 | 1.19 | + |
| X-11 | 36.67 | nd    | 0.25 | 0.07 | - | nd    | 0.09 | 0.13 | - |
| X-17 | 29.62 | 30.07 | 1.29 | 0.24 | - | nd    | 0.11 | 0.14 | - |



|      |       |       |      |      |   |       |      |      |   |
|------|-------|-------|------|------|---|-------|------|------|---|
| X-18 | 34.15 | nd    | 1.23 | 1.14 | - | nd    | 0.11 | 0.11 | - |
| X-21 | 30.87 | 30.44 | 1.21 | 1.22 | - | 28.71 | 1.32 | 0.56 | - |
| X-22 | 22.94 | 24.23 | 0.55 | 1.13 | - | 25.45 | 1.45 | 1.19 | - |
| X-25 | 29.62 | 26.53 | 1.40 | 1.03 | - | 31.15 | 1.28 | 0.74 | - |
| X-28 | 22.17 | 22.21 | 1.27 | 1.37 | + | 26.93 | 1.07 | 1.35 | - |
| X-33 | 27.41 | 27.89 | 1.38 | 1.44 | - | 32.08 | 1.38 | 0.08 | - |
| X-34 | 29.02 | 29.03 | 1.34 | 1.12 | - | 28.34 | 1.20 | 1.21 | - |
| X-53 | 18.86 | 24.04 | 1.16 | 1.49 | + | 31.75 | 1.26 | 1.17 | - |
| X-55 | 19.76 | 19.75 | 1.28 | 1.60 | + | 27.05 | 1.14 | 1.25 | - |
| X-58 | 32.76 | 32.3  | 1.10 | 0.10 | - | 33.23 | 1.32 | 1.02 | - |
| X-66 | 30.31 | 29.57 | 1.48 | 0.09 | + | nd    | 1.23 | 0.42 | - |
| X-72 | 30.5  | 29.17 | 1.40 | 0.06 | - | nd    | 0.29 | 0.29 | - |
| X-78 | 35.59 | 34.01 | 1.51 | 0.32 | - | nd    | 1.35 | 0.10 | - |
| X-81 | 31.85 | 31.51 | 1.46 | 0.10 | - | nd    | 0.31 | 0.09 | - |
| X-83 | 22.11 | 23.73 | 1.33 | 1.21 | + | 28.04 | 1.39 | 1.21 | - |
| X-84 | 34.29 | nd    | 1.42 | 0.11 | - | 31.46 | 1.23 | 0.10 | - |
| X-89 | 23.91 | 27.19 | 1.42 | 1.29 | - | 31.73 | 1.31 | 0.09 | - |

**Supplementary Table 2: Clinical information of positive samples used in Fig. 2 and Supplementary Fig. 4.**

+ = positive test; - = negative test; nd = not detected.

|           | SWAB       |                  |        |               |              | GARGLE WATER     |        |               |              |                        |
|-----------|------------|------------------|--------|---------------|--------------|------------------|--------|---------------|--------------|------------------------|
|           | RNA        |                  |        | Lysate        |              | RNA              |        | Lysate        |              |                        |
| Sample ID | COBAS (Ct) | Tib MolBiol (Ct) | ADESSO | direct ADESSO | Antigen test | Tib MolBiol (Ct) | ADESSO | direct ADESSO | Antigen test | Notes                  |
| 300       | nd         | nd               | 0.07   | 0.05          | -            | nd               | 0.16   | 0.10          | -            | Used also in Figure 1a |
| 301       | nd         | nd               | 0.06   | 0.07          | -            | nd               | 0.09   | 0.09          | -            |                        |
| 302       | nd         | nd               | 0.14   | 0.10          | -            | nd               | 0.08   | 0.06          | -            |                        |
| 303       | nd         | nd               | 0.06   | 0.07          | -            | nd               | 0.11   | 0.08          | -            |                        |
| 304       | nd         | nd               | 0.08   | 0.06          | -            | nd               | 0.11   | 0.12          | -            |                        |
| 305       | nd         | nd               | 0.07   | 0.05          | -            | nd               | 0.09   | 0.08          | -            |                        |
| 307       | nd         | nd               | 0.03   | 0.08          | -            | nd               | 0.06   | 0.09          | -            |                        |
| 308       | nd         | nd               | 0.07   | 0.06          | -            | nd               | 0.09   | 0.05          | -            |                        |
| 309       | nd         | nd               | 0.06   | 0.06          | -            | nd               | 0.08   | 0.12          | -            |                        |
| 310       | nd         | nd               | 0.05   | 0.08          | -            | nd               | 0.08   | 0.11          | -            |                        |
| 311       | nd         | nd               | 0.10   | 0.09          | -            | nd               | 0.11   | 0.11          | -            |                        |
| 312       | nd         | nd               | 0.07   | 0.04          | -            | nd               | 0.08   | 0.09          | -            |                        |
| 313       | nd         | nd               | 0.07   | 0.07          | -            | nd               | 0.07   | 0.09          | -            |                        |
| 314       | nd         | nd               | 0.09   | 0.09          | -            | nd               | 0.11   | 0.08          | -            |                        |
| 315       | nd         | nd               | 0.03   | 0.05          | -            | nd               | 0.18   | 0.10          | -            |                        |
| 317       | nd         | nd               | 0.07   | 0.12          | -            | nd               | 0.17   | 0.09          | -            |                        |
| 318       | nd         | nd               | 0.05   | 0.05          | -            | nd               | 0.14   | 0.10          | -            |                        |
| 319       | nd         | nd               | 0.11   | 0.08          | -            | nd               | 0.12   | 0.09          | -            |                        |
| 320       | nd         | nd               | 0.07   | 0.09          | -            | nd               | 0.12   | 0.11          | -            |                        |
| 321       | nd         | nd               | 0.07   | 0.07          | -            | nd               | 0.10   | 0.09          | -            |                        |
| 322       | nd         | nd               | 0.09   | 0.09          | -            | nd               | 0.09   | 0.08          | -            |                        |
| 323       | nd         | nd               | 0.08   | 0.11          | -            | nd               | 0.16   | 0.11          | -            |                        |
| 324       | nd         | nd               | 0.07   | 0.08          | -            | nd               | 0.08   | 0.13          | -            |                        |

|     |    |    |      |      |   |    |      |      |   |  |
|-----|----|----|------|------|---|----|------|------|---|--|
| 325 | nd | nd | 0.04 | 0.11 | - | nd | 0.11 | 0.12 | - |  |
| 326 | nd | nd | 0.05 | 0.10 | - | nd | 0.11 | 0.12 | - |  |
| 328 | nd | nd | 0.06 | 0.09 | - | nd | 0.11 | 0.09 | - |  |
| 330 | nd | nd | 0.08 | 0.08 | - | nd | 0.08 | 0.09 | - |  |
| 331 | nd | nd | 0.08 | 0.08 | - | nd | 0.08 | 0.05 | - |  |
| 333 | nd | nd | 0.08 | 0.09 | - | nd | 0.08 | 0.10 | - |  |
| 335 | nd | nd | 0.07 | 0.05 | - | nd | 0.09 | 0.08 | - |  |
| 336 | nd | nd | 0.04 | 0.06 | - | nd | 0.09 | 0.15 | - |  |
| 337 | nd | nd | 0.08 | 0.04 | - | nd | 0.06 | 0.08 | - |  |
| 338 | nd | nd | 0.12 | 0.14 | - | nd | 0.04 | 0.07 | - |  |
| 340 | nd | nd | 0.09 | 0.06 | - | nd | 0.05 | 0.09 | - |  |
| 341 | nd | nd | 0.09 | 0.06 | - | nd | 0.05 | 0.08 | - |  |
| 342 | nd | nd | 0.07 | 0.05 | - | nd | 0.07 | 0.11 | - |  |
| 343 | nd | nd | 0.13 | 0.08 | - | nd | 0.07 | 0.08 | - |  |
| 346 | nd | nd | 0.08 | 0.08 | - | nd | 0.07 | 0.04 | - |  |
| 347 | nd | nd | 0.13 | 0.06 | - | nd | 0.07 | 0.08 | - |  |
| 348 | nd | nd | 0.08 | 0.07 | - | nd | 0.05 | 0.08 | - |  |
| 350 | nd | nd | 0.15 | 0.05 | - | nd | 0.07 | 0.08 | - |  |
| 351 | nd | nd | 0.11 | 0.09 | - | nd | 0.07 | 0.08 | - |  |
| 352 | nd | nd | 0.10 | 0.07 | - | nd | 0.04 | 0.06 | - |  |
| 353 | nd | nd | 0.06 | 0.06 | - | nd | 0.04 | 0.07 | - |  |
| 354 | nd | nd | 0.09 | 0.11 | - | nd | 0.07 | 0.07 | - |  |
| 355 | nd | nd | 0.12 | 0.09 | - | nd | 0.03 | 0.06 | - |  |
| 356 | nd | nd | 0.12 | 0.06 | - | nd | 0.05 | 0.08 | - |  |
| 358 | nd | nd | 0.12 | 0.04 | - | nd | 0.09 | 0.09 | - |  |
| 360 | nd | nd | 0.07 | 0.07 | - | nd | 0.06 | 0.09 | - |  |
| 362 | nd | nd | 0.13 | 0.05 | - | nd | 0.05 | 0.09 | - |  |

|     |    |    |      |      |   |    |      |      |   |  |
|-----|----|----|------|------|---|----|------|------|---|--|
| 364 | nd | nd | 0.12 | 0.06 | - | nd | 0.05 | 0.07 | - |  |
| 365 | nd | nd | 0.09 | 0.05 | - | nd | 0.04 | 0.07 | - |  |
| 366 | nd | nd | 0.06 | 0.07 | - | nd | 0.05 | 0.06 | - |  |
| 367 | nd | nd | 0.08 | 0.10 | - | nd | 0.04 | 0.08 | - |  |
| 368 | nd | nd | 0.11 | 0.06 | - | nd | 0.08 | 0.08 | - |  |
| 369 | nd | nd | 0.07 | 0.05 | - | nd | 0.08 | 0.04 | - |  |
| 370 | nd | nd | 0.15 | 0.04 | - | nd | 0.15 | 0.06 | - |  |
| 371 | nd | nd | 0.15 | 0.05 | - | nd | 0.08 | 0.07 | - |  |
| 372 | nd | nd | 0.05 | 0.08 | - | nd | 0.12 | 0.09 | - |  |
| 373 | nd | nd | 0.10 | 0.05 | - | nd | 0.06 | 0.10 | - |  |
| 374 | nd | nd | 0.07 | 0.10 | - | nd | 0.19 | 0.06 | - |  |
| 375 | nd | nd | 0.10 | 0.11 | - | nd | 0.11 | 0.08 | - |  |
| 377 | nd | nd | 0.08 | 0.10 | - | nd | 0.12 | 0.09 | - |  |
| 378 | nd | nd | 0.12 | 0.12 | - | nd | 0.11 | 0.06 | - |  |
| 379 | nd | nd | 0.06 | 0.11 | - | nd | 0.16 | 0.08 | - |  |
| 380 | nd | nd | 0.11 | 0.09 | - | nd | 0.16 | 0.08 | - |  |
| 381 | nd | nd | 0.12 | 0.11 | - | nd | 0.10 | 0.09 | - |  |
| 382 | nd | nd | 0.10 | 0.12 | - | nd | 0.13 | 0.14 | - |  |
| 383 | nd | nd | 0.15 | 0.12 | - | nd | 0.16 | 0.11 | - |  |
| 384 | nd | nd | 0.16 | 0.08 | - | nd | 0.11 | 0.10 | - |  |
| 385 | nd | nd | 0.10 | 0.12 | + | nd | 0.13 | 0.12 | - |  |
| 400 | nd | nd | 0.07 | 0.08 | - | nd | 0.09 | 0.07 | - |  |
| 402 | nd | nd | 0.12 | 0.12 | - | nd | 0.13 | 0.12 | - |  |
| 403 | nd | nd | 0.10 | 0.14 | - | nd | 0.15 | 0.11 | - |  |
| 404 | nd | nd | 0.09 | 0.09 | - | nd | 0.08 | 0.10 | - |  |
| 405 | nd | nd | 0.10 | 0.14 | - | nd | 0.08 | 0.07 | - |  |
| 406 | nd | nd | 0.11 | 0.10 | - | nd | 0.08 | 0.13 | - |  |

|     |    |    |      |      |   |    |      |      |   |  |
|-----|----|----|------|------|---|----|------|------|---|--|
| 407 | nd | nd | 0.12 | 0.08 | - | nd | 0.09 | 0.10 | - |  |
| 408 | nd | nd | 0.09 | 0.12 | - | nd | 0.09 | 0.09 | - |  |
| 410 | nd | nd | 0.08 | 0.08 | - | nd | 0.11 | 0.12 | - |  |
| 411 | nd | nd | 0.09 | 0.09 | - | nd | 0.09 | 0.07 | - |  |
| 412 | nd | nd | 0.11 | 0.08 | - | nd | 0.07 | 0.08 | - |  |
| 413 | nd | nd | 0.09 | 0.08 | - | nd | 0.11 | 0.04 | - |  |
| 415 | nd | nd | 0.14 | 0.08 | - | nd | 0.16 | 0.06 | - |  |
| 416 | nd | nd | 0.15 | 0.08 | - | nd | 0.16 | 0.07 | - |  |
| 418 | nd | nd | 0.16 | 0.09 | - | nd | 0.08 | 0.08 | - |  |
| 420 | nd | nd | 0.06 | 0.08 | - | nd | 0.12 | 0.08 | - |  |
| 421 | nd | nd | 0.07 | 0.06 | - | nd | 0.04 | 0.07 | - |  |
| 422 | nd | nd | 0.08 | 0.05 | - | nd | 0.08 | 0.05 | - |  |
| 423 | nd | nd | 0.18 | 0.12 | - | nd | 0.19 | 0.08 | - |  |
| 424 | nd | nd | 0.05 | 0.08 | - | nd | 0.12 | 0.06 | - |  |
| 425 | nd | nd | 0.09 | 0.10 | - | nd | 0.12 | 0.07 | - |  |
| 426 | nd | nd | 0.09 | 0.10 | - | nd | 0.13 | 0.06 | - |  |
| 427 | nd | nd | 0.10 | 0.13 | - | nd | 0.10 | 0.09 | - |  |
| 428 | nd | nd | 0.12 | 0.10 | - | nd | 0.06 | 0.07 | - |  |
| 429 | nd | nd | 0.13 | 0.11 | - | nd | 0.12 | 0.06 | - |  |
| 430 | nd | nd | 0.09 | 0.09 | - | nd | 0.09 | 0.07 | - |  |
| 431 | nd | nd | 0.10 | 0.14 | - | nd | 0.17 | 0.11 | - |  |
| 432 | nd | nd | 0.08 | 0.14 | - | nd | 0.18 | 0.06 | - |  |
| 433 | nd | nd | 0.13 | 0.08 | - | nd | 0.17 | 0.16 | - |  |

**Supplementary Table 3: Clinical information of negative samples used in Fig. 2.**

+ = positive test; - = negative test; nd = not detected.

| Sample ID | Variant             | COBAS (Ct) | Direct ADESSO |       |      |       |         |
|-----------|---------------------|------------|---------------|-------|------|-------|---------|
|           |                     |            | Standard      | Alpha | Beta | Delta | Omicron |
| v1        | B.1.1.7 (Alpha)     | 20,3       | 1,19          | 0,96  | 0,15 | 0,16  | 0,14    |
| v2        | B.1.1.7 (Alpha)     | 18,16      | 1,28          | 0,94  | 0,14 | 0,22  | 0,14    |
| v3        | B.1.1.7 (Alpha)     | 17,7       | 1,21          | 1,11  | 0,18 | 0,23  | 0,19    |
| v4        | B.1.1.7 (Alpha)     | 18,94      | 1,23          | 0,94  | 0,22 | 0,22  | 0,16    |
| v5        | B.1.1.7 (Alpha)     | 19,94      | 1,03          | 1,05  | 0,26 | 0,21  | 0,14    |
| v6        | B.1.351 (Beta)      | 15,47      | 0,11          | 0,17  | 0,50 | 0,20  | 0,21    |
| v7        | B.1.351 (Beta)      | 18,92      | 0,13          | 0,18  | 0,65 | 0,22  | 0,18    |
| v8        | B.1.351 (Beta)      | 19,42      | 0,19          | 0,19  | 0,77 | 0,16  | 0,17    |
| v9        | B.1.351 (Beta)      | 17,38      | 0,91          | 0,14  | 0,68 | 0,15  | 0,11    |
| v10       | B.1.351 (Beta)      | 17,72      | 0,93          | 0,20  | 0,71 | 0,20  | 0,20    |
| v11       | B.1.617.2 (Delta)   | 15,96      | 1,10          | 0,15  | 0,24 | 1,13  | 0,17    |
| v12       | B.1.617.2 (Delta)   | 24,18      | 1,02          | 0,17  | 0,15 | 0,97  | 0,24    |
| v13       | B.1.617.2 (Delta)   | 17,72      | 1,08          | 0,18  | 0,22 | 1,17  | 0,12    |
| v14       | B.1.617.2 (Delta)   | 20,27      | 1,08          | 0,15  | 0,23 | 1,14  | 0,18    |
| v15       | B.1.617.2 (Delta)   | 16,8       | 1,01          | 0,19  | 0,16 | 1,12  | 0,22    |
| v16       | B.1.1.529 (Omicron) | 17,95      | 1,16          | 0,33  | 0,22 | 0,19  | 1,31    |
| v17       | B.1.1.529 (Omicron) | 21,14      | 1,26          | 0,33  | 0,21 | 0,17  | 1,22    |
| v18       | B.1.1.529 (Omicron) | 21,37      | 1,13          | 0,30  | 0,23 | 0,19  | 1,21    |
| v19       | B.1.1.529 (Omicron) | 21,31      | 1,00          | 0,34  | 0,20 | 0,16  | 1,28    |
| v20       | B.1.1.529 (Omicron) | 20,01      | 0,92          | 0,20  | 0,24 | 0,17  | 1,32    |

**Supplementary Table 4: Clinical samples information of samples used in Fig. 3 and Supplementary Fig. 5.** For ADESSO tests we report the band intensity ratios plotted in Fig. 3b. Tests resulting in a band intensity ratio higher than 0.4 are considered positive.

|                                                                               | <b>Total cost<br/>(€)</b> | <b>Number of<br/>reactions</b> | <b>Cost per<br/>reaction (€)</b> |
|-------------------------------------------------------------------------------|---------------------------|--------------------------------|----------------------------------|
| <b>Lysis</b>                                                                  |                           |                                |                                  |
| QuickExtract DNA Extraction Solution<br>(Lucigen #QE09050, 50ml)              | 283.1                     | 5000                           | <b>0.06</b>                      |
| <b>RPA reaction</b>                                                           |                           |                                |                                  |
| RPA pellet, Rehy. Buffer, MgOAc                                               | 405                       | 240                            | 1.69                             |
| F primer (5pmol per reaction; 1 tube =<br>20.000pmol)                         | 6                         | 2000                           | 0.0030                           |
| R primer (5 pmol per reaction; 1 tube =<br>20.000pmol)                        | 3                         | 2000                           | 0.0015                           |
| M-MuLV (200U/ul - M0253L = 50.000U; 60U<br>per reaction)                      | 227.2                     | 833.33                         | 0.27                             |
| RNase Inhibitor, Murine (40U/μl M0314L =<br>15.000 U; 12U per reaction)       | 230.4                     | 1250                           | 0.18                             |
| <b>Total cost per 1 RPA reaction</b>                                          |                           |                                | <b>2.15</b>                      |
| <b>Cas13 detection (lateral flow)</b>                                         |                           |                                |                                  |
| Cleavage buffer (Sigma, #T2194-100ML,<br>400mM Tris pH 7.4; 1μl per reaction) | 32.46                     | 250000                         | 0.00013                          |
| LwaCas13a protein in SB (126.6μg/ml; around<br>240ng per reaction)            | 667.25                    | 40000                          | 0.017                            |
| crRNA (40ng/ul)                                                               | 150                       | 32500                          | 0.0046                           |
| Lateral-Flow-Reporter (137nmol, 20pmol per<br>reaction) *                     | 306.7                     | 13700                          | 0.02                             |
| SUPERase-In Rnase Inhibitor (10000U, 20<br>U/μL; 20U per reaction) *          | 461.36                    | 1000                           | 0.46                             |
| Lucigen T7 Polymerase (125,000 U; 50U/μl; #<br>30223-2; 29U per reaction)     | 578.55                    | 8620                           | 0.07                             |

|                                                                                            |        |         |                    |
|--------------------------------------------------------------------------------------------|--------|---------|--------------------|
| rNTP solution mix (25mM each) (NEB, #N0466L = 2ml) (0.8µl per reaction)                    | 233.6  | 5000    | 0.05               |
| MgCl <sub>2</sub> (120mM) (#63069-100ML, Sigma Aldrich) (1µl per reaction)                 | 81     | 1660000 | 0.00005            |
| <b>Total cost per 1 Cas13 lateral flow detection reaction</b>                              |        |         | <b>0.62</b>        |
| <b>Cas13 detection (fluo readout)</b>                                                      |        |         |                    |
| Cleavage buffer (Sigma, #T2194-100ML, 400mM Tris pH 7.4; 1µl per reaction)                 | 32.46  | 250000  | 0.00013            |
| LwaCas13a protein in SB (126.6µg/ml; around 240ng per reaction)                            | 667.25 | 40000   | 0.017              |
| crRNA (40ng/ul)                                                                            | 150    | 32500   | 0.0046             |
| LwaCas13a specific fluorescent reporter (from IDT, 12.9nmol) (2pmol/reaction)              | 328.65 | 6450    | 0.05               |
| RNase Inhibitor, Murine (40U/µl M0314L = 15.000 U; 40U per reaction)                       | 230.4  | 750     | 0.31               |
| Lucigen T7 Polymerase (125,000 U; 50U/µl; # 30223-2; 29U per reaction)                     | 578.55 | 8620    | 0.07               |
| rNTP solution mix (25mM each) (NEB, #N0466L = 2ml) (0.8µl per reaction)                    | 233.6  | 5000    | 0.05               |
| MgCl <sub>2</sub> (120mM) (#63069-100ML, Sigma Aldrich) (1µl per reaction)                 | 81     | 1660000 | 0.00005            |
| <b>Total cost per 1 Cas13 fluorescence detection reaction</b>                              |        |         | <b>0.50</b>        |
| <b>Milenia HybriDetect 1 (TwistDx, cat. no. MILENIA01) (only for lateral flow readout)</b> |        |         |                    |
|                                                                                            | 205    | 100     | <b>2.05</b>        |
| <b><u>Total cost per 1 ADESSO reaction with lateral flow stick</u></b>                     |        |         |                    |
|                                                                                            |        |         | <b><u>4.88</u></b> |
| <b><u>Total cost per 1 ADESSO reaction with fluo readout</u></b>                           |        |         |                    |
|                                                                                            |        |         | <b><u>2.71</u></b> |



| <b>Cas13 purification</b>                        | <b>Cost of one bottle/item (€)</b> | <b>Approx. amount needed for purification</b> | <b>Approx. cost for one purification (€)</b> |
|--------------------------------------------------|------------------------------------|-----------------------------------------------|----------------------------------------------|
| Yeast extract                                    | 270 - 2.5 kg                       | 125 g                                         | 13.5                                         |
| Peptone                                          | 165 - 500 g                        | 100 g                                         | 33                                           |
| IPTG                                             | 230 - 5 g                          | 600 mg                                        | 28                                           |
| Ampicillin                                       | 230 - 50 g                         | 0.5 g                                         | 2.3                                          |
| Tris pH 8 1M                                     | 80 - 1 L                           | 40 mL                                         | 3.2                                          |
| Tris pH 7.5 1M                                   | 80 - 1 L                           | 2.5 mL                                        | 0.25                                         |
| NaCl                                             | 180 - 10 kg                        | 200 g                                         | 3.4                                          |
| DTT                                              | 185 - 10 g                         | 630 mg                                        | 11                                           |
| Lysozyme                                         | 215 - 10 g                         | 600 mg                                        | 13                                           |
| Benzoase                                         | 200 - 25000 units in 100 $\mu$ L   | 6 $\mu$ L                                     | 13                                           |
| Sumo Protease                                    | 480 - 250 units at 1 U/ $\mu$ L    | 150 $\mu$ L                                   | 288                                          |
| Hepes                                            | 295 - 500 g                        | 2.4 g                                         | 1.4                                          |
| MgCl <sub>2</sub>                                | 20 - 100 g                         | 0.5 g                                         | 0.1                                          |
| Glycerol                                         | 70 - 2.5 L                         | 2.5 mL                                        | 0.1                                          |
| Imidazole                                        | 130 - 500 g                        | 18 g                                          | 5                                            |
| HIS trap columns (high performance)              | 180 - pkg of 5                     | 1                                             | 36                                           |
| Protease inhibitors (EDTA free complete tablets) | 360 - 20 tblts                     | 12                                            | 216                                          |
| <b>Total</b>                                     |                                    |                                               | <b>667.25</b>                                |

|                                                                             |                       |                        |                                 |
|-----------------------------------------------------------------------------|-----------------------|------------------------|---------------------------------|
| Purification yielded enough for approx. 40,000 reactions                    |                       |                        |                                 |
| <b>Therefore total cost div by 40000 is the cost per reaction -----&gt;</b> | <b>0.01668125</b>     |                        |                                 |
| <b>Storage Buffer for Cas13a protein</b>                                    | <b>Total cost (€)</b> | <b>Number of preps</b> | <b>Cost per prep (50mL) (€)</b> |
| Tris-HCl (pH 7.5, 1 M, 1L from Sigma Aldrich) (2.5mL per prep)              | 75                    | 400                    | 0.1875                          |
| NaCl (5 M, from 5kg in powder) (6mL per prep)                               | 24.7                  | 14259.63952            | 0.001732162                     |
| glycerol (1L) (2.5mL per prep)                                              | 19.06                 | 400                    | 0.04765                         |
| DTT (1M, from 25g) (100µl per prep)                                         | 118.81                | 1620.714022            | 0.073307196                     |
| UltraPure water (500mL) (38.9mL per prep)                                   | 11.81                 | 12.85347044            | 0.918818                        |
| <b>Total cost per 1 prep (50mL --&gt; 326.8 x 79 reactions)</b>             |                       |                        | <b>1.229007357</b>              |
| <b>Total cost per 1 Cas13 detection reaction</b>                            |                       |                        | <b>0.0000476</b>                |

**Supplementary Table 5:** ADESSO cost per reaction.

| <b>Oligos</b>                             |                                                                  |             |                                                                                       |
|-------------------------------------------|------------------------------------------------------------------|-------------|---------------------------------------------------------------------------------------|
| <b>Name</b>                               | <b>Sequence (5'-&gt;3')</b>                                      | <b>Fig.</b> | <b>Purpose</b>                                                                        |
| T7-3G oligo                               | gaaattaatacgcactactataggg                                        |             | T7 promoter annealing oligonucleotide for IVT                                         |
| S gene RT-RPA forward primer              | gaaattaatacgcactactatagggA<br>GGTTTCAAACCTTTACTTGC<br>TTTACATAGA | 1-3, S1-S5  | Primer for pre-amplification step using RT-RPA - S - Zhang Protocol <sup>2</sup>      |
| S gene RT-RPA reverse primer              | TCCTAGGTTGAAGATAACC<br>CACATAATAAG                               | 1-3, S1-S5  | Primer for pre-amplification step using RT-RPA - S - Zhang Protocol <sup>2</sup>      |
| Orf1a RT-RPA forward primer 1             | gaaattaatacgcactactatagggC<br>GAAGTTGTAGGAGACATTA<br>TACTTAAACC  | S1c         | Primer for pre-amplification step using RT-RPA - Orf1ab - Zhang Protocol <sup>2</sup> |
| Orf1a RT-RPA reverse primer 1             | TAGTAAGACTAGAATTGTC<br>TACATAAGCAGC                              | S1c         | Primer for pre-amplification step using RT-RPA - Orf1ab - Zhang Protocol <sup>2</sup> |
| Orf1a gene RT-PCR forward primer          | gaaattaatacgcactactatagggC<br>GCGCAGGGAATGGATAAT<br>CTTG         | S1c         | Primer for producing RNA target for Orf1a                                             |
| Orf1a gene RT-PCR reverse primer          | GCAGCTAAACCATGAGTAG<br>CAAGG                                     | S1c         | Primer for producing RNA target for Orf1a                                             |
| S gene RT-PCR forward primer              | gaaattaatacgcactactatagggAT<br>TTAGTGCGTGATCTCCCTC<br>AGG        | S1c         | Primer for producing RNA target for S                                                 |
| S gene RT-PCR reverse primer              | TTTCTGAGAGAGGGTCAAG<br>TGCAC                                     | S1c         | Primer for producing RNA target for S                                                 |
| S A67, HV69-70, D80 RT-RPA forward primer | gaaattaatacgcactactatagggG<br>TTCTTACCTTTCTTTTCCAA<br>TGTTACT    | 3, S5a-c    | Primer F for pre-amplification step using RT-RPA - S ADESSO-Alpha, -Beta, -Omicron    |
| S A67, HV69-70, D80 RT-                   | AAATAAACACCATCATTA<br>TGGTAGGAC                                  | 3, S5a-c    | Primer R (1) for pre-amplification step using RT-RPA - S                              |

|                                          |                                                                                                                                  |            |                                                                                         |
|------------------------------------------|----------------------------------------------------------------------------------------------------------------------------------|------------|-----------------------------------------------------------------------------------------|
| RPA rev. primer 1                        |                                                                                                                                  |            | ADESSO-Alpha, -Beta, - Omicron                                                          |
| S A67, HV69-70, D80 RT-RPA rev. primer 2 | GTAGGACAGGGTTATCAAA<br>CCTCTTAGTA                                                                                                | S5a        | Primer R (2) for pre-amplification step using RT-RPA - S ADESSO-Alpha, -Beta, - Omicron |
| S T478 RT-RPA forward primer             | gaaattaatacgcactcactatagggG<br>AAGTCTAATCTCAAACCTTT<br>TGAGAGAGA                                                                 | 3, S5a-c   | Primer F for pre-amplification step using RT-RPA - S ADESSO-Delta                       |
| S T478 RT-RPA rev. primer 1              | GGTTGGAAACCATATGATT<br>GTAAAGGAAAG                                                                                               | S5a        | Primer R (1) for pre-amplification step using RT-RPA - S ADESSO-Delta                   |
| S T478 RT-RPA rev. primer 2              | ATGATTGTAAAGGAAAGTA<br>ACAATTAACCTTCAA                                                                                           | 3, S5a-c   | Primer R (2) for pre-amplification step using RT-RPA - S ADESSO-Delta                   |
| <b>crRNAs</b>                            |                                                                                                                                  |            |                                                                                         |
| S crRNA (IVT template)                   | CTTCTTCAGGTTGGACAGC<br>TGGTGCTGC <b>GTTTTAGTCC</b><br><b>CCTTCGTTTTTGGGGTAGT</b><br><b>CTAAATC</b> ccctatagtgagtcgtatt<br>aattc  | 1-3, S1-S5 | LwaCas13a crRNA IVT template - crRNA S gene                                             |
| S crRNA                                  | <b>GAUUUAGACUACCCCAA</b><br><b>AACGAAGGGGACUAAAAC</b><br>GCAGCACCAGCUGUCCAA<br>CCUGAAGAAG                                        | 1-3, S1-S5 | crRNA resulting from IVT                                                                |
| Orf1a crRNA 1 (IVT template)             | ATAGTTTAAAAATTACAGAA<br>GAGGTTGG <b>GTTTTAGTCCC</b><br><b>CTTCGTTTTTGGGGTAGTC</b><br><b>TAAATC</b> ccctatagtgagtcgtatta<br>atttc | S1c        | LwaCas13a crRNA IVT template - crRNA orf1a gene                                         |
| Orf1a crRNA                              | <b>GAUUUAGACUACCCCAA</b><br><b>AACGAAGGGGACUAAAAC</b><br>CCAACCUCUUCUGUAAUU<br>UUUAAACUAAU                                       | S1c        | crRNA resulting from IVT                                                                |

|                                     |                                                                                                                           |          |                                                                                           |
|-------------------------------------|---------------------------------------------------------------------------------------------------------------------------|----------|-------------------------------------------------------------------------------------------|
| S HV69-70 crRNA (IVT template)      | TCCATGCTATACATGTCTC<br>TGGGACCAAGTTTTAGTCC<br><b>CCTTCGTTTTTGGGGTAGT</b><br><b>CTAAATC</b> ccctatagtgagtcgtatt<br>aatttc  | S5a      | LwaCas13a crRNA IVT template<br>- crRNA S gene targeting region<br>containing HV69-70     |
| S HV69-70 crRNA                     | <b>GAUUUAGACUACCCCAA</b><br><b>AACGAAGGGGACUAAAAC</b><br>UUGGUCCCAGAGACAUGU<br>AUAGCAUGGA                                 | S5a      | crRNA resulting from IVT                                                                  |
| S T478 (IVT template)               | ACTGAAATCTATCAGGCCG<br>GTAGCACACGTTTTAGTCC<br><b>CCTTCGTTTTTGGGGTAGT</b><br><b>CTAAATC</b> ccctatagtgagtcgtatt<br>aatttc  | S5a      | LwaCas13a crRNA IVT template<br>- crRNA S gene targeting region<br>containing T478        |
| S T478 crRNA                        | <b>GAUUUAGACUACCCCAA</b><br><b>AACGAAGGGGACUAAAAC</b><br>GUGUGCUACCGGCCUGAU<br>AGAUUUCAGU                                 | S5a      | crRNA resulting from IVT                                                                  |
| S crRNA ADESSO-Alpha (IVT template) | GGTTCATGCTATCTCTGG<br>GACCTAAGGGTTTTAGTCC<br><b>CCTTCGTTTTTGGGGTAGT</b><br><b>CTAAATC</b> ccctatagtgagtcgtatt<br>aatttc   | 3, S5b,c | LwaCas13a crRNA IVT template<br>- probe S gene specific for<br>del69-70 for Alpha variant |
| S crRNA ADESSO-Alpha                | <b>GAUUUAGACUACCCCAA</b><br><b>AACGAAGGGGACUAAAAC</b><br>CCUUAAGGUCCCAGAGAU<br>GCAUGGAACC                                 | 3, S5b,c | crRNA resulting from IVT                                                                  |
| S crRNA ADESSO-Beta (IVT template)  | GGGAGCAATGGTACTAAG<br>AGGTTAGCTAGTTTTAGTCC<br><b>CCCTTCGTTTTTGGGGTAG</b><br><b>TCTAAATC</b> ccctatagtgagtcgta<br>ttaatttc | 3, S5b,c | LwaCas13a crRNA IVT template<br>- probe S gene specific for D80A<br>for Beta variant      |
| S crRNA ADESSO-Beta                 | <b>GAUUUAGACUACCCCAA</b><br><b>AACGAAGGGGACUAAAAC</b><br>UAGCUAACCUUUAGUAC<br>CAUUGCUC                                    | 3, S5b,c | crRNA resulting from IVT                                                                  |

|                                                 |                                                                                                                                 |                |                                                                                                     |
|-------------------------------------------------|---------------------------------------------------------------------------------------------------------------------------------|----------------|-----------------------------------------------------------------------------------------------------|
| S crRNA<br>ADESSO-Delta<br>(IVT template)       | ACTGTAATCTATCAGGCCG<br>GTAGGAAAC <b>GTTTTAGTCC</b><br><b>CCTTCGTTTTTGGGGTAGT</b><br><b>CTAAATC</b> ccctatagtgagtcgtatt<br>aattc | 3, S5b,c       | LwaCas13a crRNA IVT template<br>- probe S gene specific for<br>T478K for Delta variant              |
| S crRNA<br>ADESSO-Delta                         | <b>GAUUUAGACUACCCCAA</b><br><b>AACGAAGGGGACUAAAAC</b><br>GU <b>UUC</b> CUACCGGCCUGAU<br>AGAU <b>UAC</b> AGU                     | 3, S5b,c       | crRNA resulting from IVT                                                                            |
| S crRNA<br>ADESSO-<br>Omicron (IVT<br>template) | CCAAAGTTACTTGGTTCCA<br>TGTTTTGTC <b>GTTTTAGTCC</b><br><b>CCTTCGTTTTTGGGGTAGT</b><br><b>CTAAATC</b> ccctatagtgagtcgtatt<br>aattc | 3, S5b,c       | LwaCas13a crRNA IVT template<br>- probe S gene specific for<br>A67V+del69-70 for Omicron<br>variant |
| S crRNA<br>ADESSO-<br>Omicron                   | <b>GAUUUAGACUACCCCAA</b><br><b>AACGAAGGGGACUAAAAC</b><br>GAC <b>AAAC</b> AUGGAACCAA<br>GUAAC <b>UUUG</b>                        | 3, S5b,c       | crRNA resulting from IVT                                                                            |
| <b>RNA reporters</b>                            |                                                                                                                                 |                |                                                                                                     |
| Lateral Flow<br>RNA reporter                    | 56-FAM/rUrUrUrUrUrU/3Bio                                                                                                        | 1-3, S1-<br>S5 |                                                                                                     |
| Fluorescence<br>RNA reporter                    | 5TEX615/T*A*rArUG*C*/3IAb<br>RQSp                                                                                               | 1, S3          |                                                                                                     |

**Supplementary Table 6:** Oligonucleotides used in this study. T7-3G sequence (or its complementary in the IVT templates oligos) is written in lowercase letters. Direct repeat sequences (or their complementary in the IVT templates oligos) of the crRNAs are highlighted in bold. The bases pairing with the specific mutation to be detected are highlighted in bold-red, and the synthetic mismatches<sup>3</sup> are highlighted in bold-blue.

| <b>Reagent</b>                                 | <b>Reaction</b> | <b>Details</b>                                   |
|------------------------------------------------|-----------------|--------------------------------------------------|
| plasmid # 90097                                | Cas13 synthesis | Addgene                                          |
| Rosetta cells                                  | Cas13 synthesis | See Kellner et al 2019                           |
| Terrific Broth                                 | Cas13 synthesis | See Kellner et al 2019                           |
| Ampicillin                                     | Cas13 synthesis | See Kellner et al 2019                           |
| IPTG                                           | Cas13 synthesis | See Kellner et al 2019                           |
| Lysis Buffer                                   | Cas13 synthesis | See Kellner et al 2019                           |
| Complete Ultra EDTA-free tablets               | Cas13 synthesis | See Kellner et al 2019                           |
| Lysozyme                                       | Cas13 synthesis | See Kellner et al 2019                           |
| Benzoase                                       | Cas13 synthesis | See Kellner et al 2019                           |
| Tris                                           | Cas13 synthesis | See Kellner et al 2019                           |
| NaCl                                           | Cas13 synthesis | See Kellner et al 2019                           |
| DTT                                            | Cas13 synthesis | See Kellner et al 2019                           |
| SUMO protease                                  | Cas13 synthesis | See Kellner et al 2019                           |
| HEPES                                          | Cas13 synthesis | See Kellner et al 2019                           |
| MgCl <sub>2</sub>                              | Cas13 synthesis | See Kellner et al 2019                           |
| gel filtration buffer                          | Cas13 synthesis | See Kellner et al 2019                           |
| synthetic SARS-CoV-2 RNA                       | RT-RPA (ADESSO) | Twist Biosciences<br>MT007544.1 or<br>MN908947.3 |
| SARS-CoV-2 RNA                                 | RT-RPA (ADESSO) | Prof. Bartenschlager<br>(DKFZ, Heidelberg)       |
| OneStep RT-PCRkit                              | RT-PCR          | Qiagen, #210212                                  |
| PCR clean-up kit                               | RT-PCR?         | Macherey-Nagel,<br>#740609.250                   |
| HiScribe T7 Quick High Yield RNA Synthesis Kit | IVT             | NEB, #E2050S                                     |

|                                                                  |                                                                              |                                                             |
|------------------------------------------------------------------|------------------------------------------------------------------------------|-------------------------------------------------------------|
| Monarch RNA Cleanup Kit                                          | IVT                                                                          | NEB, #T2050                                                 |
| Qubit RNA broad range (BR) kit                                   | IVT                                                                          | ThermoFisher Scientific, #Q10211                            |
| Sterile 0.9% saline                                              | gargle sample collection                                                     | Fa. Fresenius Kabi, Bad Homburg, Germany                    |
| flocked swabs                                                    | swab sample collection                                                       | (Improswab, Fa. Improve Medical Instruments, Guanzhou/China |
| cobas 6800 system kit                                            | RT-qPCR (Mannheim)                                                           | Roche, Penzberg, Germany                                    |
| QIAamp® Viral RNA Mini kit                                       | RNA extraction                                                               | Qiagen, #52904                                              |
| Nucleic Acid isolation Kit I                                     | RNA extraction                                                               | Roche                                                       |
| CDC taqman RT-qPCR                                               | DKFZ RT-qPCR                                                                 |                                                             |
| Superscript III One-Step RT-PCR kit with Platinum Taq Polymerase | DKFZ RT-qPCR                                                                 |                                                             |
| Sarbeco E-Gen-Kit                                                | RT-qPCR (Mannheim)                                                           | Fa. Tib Molbiol, Berlin, Germany                            |
| QuickExtract DNA Extraction solution                             | sample lysis (direct ADESSO)                                                 | Lucigen, #QE09050                                           |
| Rnase Inhibitor, Murine                                          | sample lysis, RT-RPA, fluorescence Cas13 reaction (ADESSO and direct ADESSO) | NEB, #M0314                                                 |
| Agencourt RNAClean XP Kit                                        | IVT                                                                          | Beckman Coulter, #A63987                                    |
| Mini-PROTEAN TBE-Ureaprecast gel 10%                             | IVT                                                                          | Bio-Rad #4566033                                            |
| TwistAmp Basic                                                   | RT-RPA (ADESSO)                                                              | TwistDx, #TABAS03KIT                                        |
| M-MuLV Reverse Transcriptase                                     | RT-RPA (ADESSO)                                                              | NEB, #M0253                                                 |
| <i>Lwa</i> Cas13a protein                                        | Cas13 reaction (ADESSO)                                                      | N/A                                                         |



|                                                |                                                         |                                      |
|------------------------------------------------|---------------------------------------------------------|--------------------------------------|
| nuclease-free water                            | Cas13 reaction (ADESSO)                                 | ThermoFisher Scientific, #AM9937     |
| Trizma® hydrochloride solution pH 7.4 1M       | Storage and Cleavage Buffer for Cas13 reaction (ADESSO) | Sigma-Aldrich, #T2194                |
| NaCl 5M                                        | Storage Buffer for Cas13 reaction (ADESSO)              | Sigma-Aldrich, cat. no. S7653        |
| Glycerol                                       | Storage Buffer for Cas13 reaction (ADESSO)              | Carl Roth, #6967.1                   |
| SUPERase-In RNase inhibitor                    | Cas13 reaction (ADESSO)                                 | ThermoFisher Scientific, #AM2694     |
| rNTP solution mix                              | Cas13 reaction (ADESSO)                                 | NEB, #N0466                          |
| NxGen T7 RNA Polymerase                        | Cas13 reaction (ADESSO)                                 | Lucigen, #30223-2                    |
| MgCl <sub>2</sub>                              | Cas13 reaction (ADESSO)                                 | Invitrogen, #AM9530G                 |
| HybriDetect — Universal Lateral Flow Assay Kit | lateral flow assay (ADESSO)                             | Milenia Biotec GmbH, Gießen, #MGHD 1 |
| RNaseAlert Lab Test Kit v2                     | RNase activity detection assay                          | Thermo Fisher Scientific, #4479768   |
| RIDA QUICK SARS-CoV-2 Antigen test             | Antigen test                                            | R-Biopharm AG, #N6803                |

**Supplementary Table 7:** Reagents and materials used in this study.

**Supplementary Methods:**

Below, we provide specific details for each experiment shown in this study.

| <b>Fig. S1c (target: S, Orf1a) and S1d (target: S)</b> |                    |
|--------------------------------------------------------|--------------------|
| <b>RT-RPA (1x)</b>                                     | <b>Volume (μl)</b> |
| Rehydration Buffer (RB)                                | 5.9                |
| F primer (10μM)                                        | 0.5                |
| R primer (10μM)                                        | 0.5                |
| M-MuLV RT (5 U/μl)                                     | 1.6                |
| Sample                                                 | 1.0                |
| MgOAc                                                  | 0.5                |
| <b>Total volume</b>                                    | <b>10</b>          |
| Incubation at 42°C for 25 min                          |                    |
| <b>Cas13 detection</b>                                 | <b>Volume (μl)</b> |
| Cleavage buffer (400mM Tris pH 7.4)                    | 2                  |
| Nuclease-free water                                    | 9.6                |
| LwaCas13a protein in SB (63.3μg/ml)                    | 2                  |
| crRNA (10ng/μl)                                        | 1                  |
| Lateral-Flow-Reporter (20μM)                           | 1                  |
| SUPERase-In Rnase Inhibitor                            | 1                  |
| Lucigen T7 Polymerase                                  | 0.6                |
| rNTP solution mix (25mM each)                          | 0.8                |
| MgCl <sub>2</sub> (120mM)                              | 1                  |
| RPA reaction step                                      | 1                  |
| <b>Total volume</b>                                    | <b>20</b>          |
| Incubation at 37°C for 30 minutes                      |                    |

| <b>Fig. 1b (target: S)</b>               |                    |                   |                   |                   |
|------------------------------------------|--------------------|-------------------|-------------------|-------------------|
| <b>RT-RPA (1x)</b>                       | <b>Volume (µl)</b> |                   |                   |                   |
|                                          | <b>Protocol 1</b>  | <b>Protocol 2</b> | <b>Protocol 3</b> | <b>Protocol 4</b> |
| Rehydration Buffer (RB)                  | 5.9                | 5.9               | 5.9               | 5.9               |
| F primer (1, 2, 3: 20µM; 4: 50µM)        | 0.25               | 0.25              | 0.25              | 0.1               |
| R primer (1, 2, 3: 20µM; 4: 50µM)        | 0.25               | 0.25              | 0.25              | 0.1               |
| M-MuLV (200U/µl - M0253)                 | 1.8                | 1                 | 0.3               | 0.6               |
| RNase Inhibitor, Murine (40U/µl - M0314) | 0.3                | 0.3               | 0.3               | 0.3               |
| Sample                                   | 1                  | 1.8               | 2.5               | 2.5               |
| MgOAc                                    | 0.5                | 0.5               | 0.5               | 0.5               |
| <b>Total volume</b>                      | <b>10</b>          | <b>10</b>         | <b>10</b>         | <b>10</b>         |
| Incubation at 42°C for 25 min            |                    |                   |                   |                   |
| <b>Cas13 detection</b>                   | <b>Volume (µl)</b> |                   |                   |                   |
| Cleavage buffer (400mM Tris pH 7.4)      | 2                  |                   |                   |                   |
| Nuclease-free water                      | 9.6                |                   |                   |                   |
| LwaCas13a protein in SB (63.3µg/ml)      | 2                  |                   |                   |                   |
| crRNA (10ng/µl)                          | 1                  |                   |                   |                   |
| Lateral-Flow-Reporter (20µM)             | 1                  |                   |                   |                   |
| SUPERase-In Rnase Inhibitor              | 1                  |                   |                   |                   |
| Lucigen T7 Polymerase                    | 0.6                |                   |                   |                   |
| rNTP solution mix (25mM each)            | 0.8                |                   |                   |                   |
| MgCl <sub>2</sub> (120mM)                | 1                  |                   |                   |                   |
| RPA reaction step                        | 1                  |                   |                   |                   |
| <b>Total volume</b>                      | <b>20</b>          |                   |                   |                   |

Incubation at 37°C for 30 minutes

**Fig. S3a,b (target: S)**

| <b>RT-RPA</b>                           | <b>Volume (μl)</b> |           |           |           |           |
|-----------------------------------------|--------------------|-----------|-----------|-----------|-----------|
|                                         | <b>1x</b>          | <b>2x</b> | <b>3x</b> | <b>4x</b> | <b>5x</b> |
| Rehydration Buffer (RB)                 | 5.9                | 11.8      | 17.7      | 23.6      | 29.5      |
| F primer (20μM)                         | 0.25               | 0.5       | 0.75      | 1         | 1.25      |
| R primer (20μM)                         | 0.25               | 0.5       | 0.75      | 1         | 1.25      |
| M-MuLV RT (200U/μl - M0253)             | 0.30               | 0.6       | 0.9       | 1.2       | 1.5       |
| Rnase Inhibitor Murine (40U/μl - M0314) | 0.3                | 0.6       | 0.9       | 1.2       | 1.5       |
| Sample                                  | 2.5                | 5         | 7.5       | 10        | 12.5      |
| MgOAc                                   | 0.5                | 1         | 1.5       | 2         | 2.5       |
| <b>Total volume</b>                     | <b>10</b>          | <b>20</b> | <b>30</b> | <b>40</b> | <b>50</b> |
| Incubation at 42°C for 25 min           |                    |           |           |           |           |
| <b>Cas13 detection</b>                  | <b>Volume (μl)</b> |           |           |           |           |
| Cleavage buffer (400mM Tris pH 7.4)     | 2                  |           |           |           |           |
| Nuclease-free water                     | 9.6                |           |           |           |           |
| LwaCas13a protein in SB (63.3μg/ml)     | 2                  |           |           |           |           |
| crRNA (10ng/μl)                         | 1                  |           |           |           |           |
| Lateral-Flow-Reporter (20μM)            | 1                  |           |           |           |           |
| SUPERase-In Rnase Inhibitor             | 1                  |           |           |           |           |
| Lucigen T7 Polymerase                   | 0.6                |           |           |           |           |
| rNTP solution mix (25mM each)           | 0.8                |           |           |           |           |
| MgCl <sub>2</sub> (120mM)               | 1                  |           |           |           |           |
| RPA reaction step                       | 1                  |           |           |           |           |

|                                   |           |
|-----------------------------------|-----------|
| <b>Total volume</b>               | <b>20</b> |
| Incubation at 37°C for 30 minutes |           |

| <b>Fig. S3c,d (target: S)</b>                               |                                  |                                |                                |
|-------------------------------------------------------------|----------------------------------|--------------------------------|--------------------------------|
| <b>Cas13 detection (fluorescence readout)</b>               | <b>Volume (µl)</b>               |                                |                                |
|                                                             | <b>Cas13 45nM + crRNA 22.5nM</b> | <b>Cas13 45nM + crRNA 45nM</b> | <b>Cas13 90nM + crRNA 90nM</b> |
| Nuclease-free water                                         | 8.6                              | 8.6                            | 8.6                            |
| Cleavage buffer (400mM Tris pH 7.4)                         | 2                                | 2                              | 2                              |
| LwaCas13a protein (63.3µg/ml; 126.6µg/ml)                   | 2                                | 2                              | 2                              |
| crRNA (10ng/µl; 20ng/µl; 40ng/µl)                           | 1                                | 1                              | 1                              |
| LwaCas13a specific fluo reporter (2µM; 4µM)                 | 1                                | 1                              | 1                              |
| Murine Rnase Inhibitor (40 U/µl)                            | 1                                | 1                              | 1                              |
| rNTP solution mix (25mM each)                               | 0.8                              | 0.8                            | 0.8                            |
| Lucigen T7 RNA Polymerase (50 U/µl)                         | 0.6                              | 0.6                            | 0.6                            |
| MgCl <sub>2</sub> (120mM)                                   | 1                                | 1                              | 1                              |
| Total divided by number of samples                          | 18.0                             | 18.0                           | 18.0                           |
| RPA reaction                                                | 2.0                              | 2.0                            | 2.0                            |
| <b>Total volume</b>                                         | <b>20.0</b>                      | <b>20.0</b>                    | <b>20.0</b>                    |
| Incubation at 37°C for 3 hours, measurement every 5 minutes |                                  |                                |                                |

| <b>Fig. S3e,f (target: S)</b>                                             |                    |
|---------------------------------------------------------------------------|--------------------|
| <b>RT-RPA (2x)</b>                                                        | <b>Volume (µl)</b> |
| Rehydration Buffer (RB)                                                   | 11.8               |
| F primer (20µM)                                                           | 0.5                |
| R primer (20µM)                                                           | 0.5                |
| M-MuLV RT (200U/µl - M0253)                                               | 0.3                |
| Rnase Inhibitor Murine (40U/µl - M0314)                                   | 0.3                |
| Sample                                                                    | 5.6                |
| MgOAc                                                                     | 1                  |
| <b>Total volume</b>                                                       | <b>20</b>          |
| Incubation at 42°C for 25 min                                             |                    |
| <b>Cas13 detection (half volume)</b>                                      | <b>Volume (µl)</b> |
| Nuclease-free water                                                       | 4.3                |
| Cleavage buffer (400mM Tris pH 7.4)                                       | 1                  |
| LwaCas13a protein in 74µl SB (126.6µg/ml)                                 | 1                  |
| crRNA (40ng/µl)                                                           | 0.5                |
| Lateral-Flow-Reporter (20µM)                                              | 0.5                |
| SUPERase-In Rnase Inhibitor (20U/µl)                                      | 0.5                |
| rNTP solution mix (25mM each)                                             | 0.4                |
| Lucigen T7 RNA Polymerase                                                 | 0.3                |
| MgCl <sub>2</sub> (120mM)                                                 | 0.5                |
| RPA reaction step                                                         | 1                  |
| <b>Total volume</b>                                                       | <b>10</b>          |
| Incubation at 37°C for 5-10-15-20-25-30 minutes (negative control 30 min) |                    |

| <b>Fig. 1d-e, 2, 3b, S4, S5a (target: S, S HV69-70, S T478)</b> |                    |
|-----------------------------------------------------------------|--------------------|
| <b>RT-RPA 2x</b>                                                | <b>Volume (µl)</b> |
| Rehydration Buffer (RB)                                         | 11.8               |
| F primer (20µM)                                                 | 0.5                |
| R primer (20µM)                                                 | 0.5                |
| M-MuLV RT (200U/µl - M0253)                                     | 0.3                |
| Rnase Inhibitor Murine (40U/µl - M0314)                         | 0.3                |
| Sample                                                          | 5.6                |
| MgOAc                                                           | 1                  |
| <b>Total volume</b>                                             | <b>20</b>          |
| Incubation at 42°C for 45 min                                   |                    |
| <b>Cas13 detection (half volume)</b>                            | <b>Volume (µl)</b> |
| Nuclease-free water                                             | 4.3                |
| Cleavage buffer (400mM Tris pH 7.4)                             | 1                  |
| LwaCas13a protein in 74µl SB (126.6µg/ml)                       | 1                  |
| crRNA (40ng/µl)                                                 | 0.5                |
| Lateral-Flow-Reporter (20µM)                                    | 0.5                |
| SUPERase-In Rnase Inhibitor                                     | 0.5                |
| rNTP solution mix (25mM each)                                   | 0.4                |
| Lucigen T7 RNA Polymerase                                       | 0.3                |
| MgCl <sub>2</sub> (120mM)                                       | 0.5                |
| RPA reaction step                                               | 1                  |
| <b>Total volume</b>                                             | <b>10.0</b>        |
| Incubation at 37°C for 10 minutes                               |                    |

| <b>Fig. 3b, S5b-e (target: S HV69-70del, S D80A, S A67V+HV69-70del, S T478K)</b> |                    |
|----------------------------------------------------------------------------------|--------------------|
| <b>RT-RPA 2x</b>                                                                 | <b>Volume (µl)</b> |
| Rehydration Buffer (RB)                                                          | 11.8               |
| F primer (20µM)                                                                  | 0.5                |
| R primer (20µM)                                                                  | 0.5                |
| M-MuLV RT (200U/µl - M0253)                                                      | 0.3                |
| Rnase Inhibitor Murine (40U/µl - M0314)                                          | 0.3                |
| Sample                                                                           | 5.6                |
| MgOAc                                                                            | 1                  |
| <b>Total volume</b>                                                              | <b>20</b>          |
| Incubation at 42°C for 45 min                                                    |                    |
| <b>Cas13 detection (half volume)</b>                                             | <b>Volume (µl)</b> |
| Nuclease-free water                                                              | 4.3                |
| Cleavage buffer (400mM Tris pH 7.4)                                              | 1                  |
| LwaCas13a protein in 74µl SB (126.6µg/ml)                                        | 1                  |
| crRNA (40ng/µl)                                                                  | 0.5                |
| Lateral-Flow-Reporter (20µM)                                                     | 0.5                |
| SUPERase-In Rnase Inhibitor                                                      | 0.5                |
| rNTP solution mix (25mM each)                                                    | 0.4                |
| Lucigen T7 RNA Polymerase                                                        | 0.3                |
| MgCl <sub>2</sub> (120mM)                                                        | 0.5                |
| RPA reaction step                                                                | 1                  |
| <b>Total volume</b>                                                              | <b>10.0</b>        |
| Incubation at 37°C for 20 minutes                                                |                    |



## Supplementary References

1. Kellner, M. J., Koob, J. G., Gootenberg, J. S., Abudayyeh, O. O. & Zhang, F. SHERLOCK: nucleic acid detection with CRISPR nucleases. *Nat. Protoc.* **14**, 2986–3012 (2019).
2. Zhang, F., Abudayyeh, O. O. & Gootenberg, J. S. A protocol for detection of COVID-19 using CRISPR diagnostics. (2020).
3. Gootenberg, J. S. *et al.* Nucleic acid detection with CRISPR-Cas13a/C2c2. *Science* **356**, 438–442 (2017).
