# Supplementary material
Source: PubMed Central journal article supplement (PMC9177677)
Supplement: 41467_2022_30862_MOESM3_ESM.pdf [file 41467_2022_30862_MOESM3_ESM.pdf]

## **Description of Additional Supplementary Files**

File Name: Supplementary Data 1

Description: This file contains all the sequencing information about variant samples

File Name: Supplementary Data 2

Description: This file contains all the SNVs in S shown in Supplementary Fig. 5e.

File Name: Supplementary Data 3

Description: This file contains the frequencies of SNVs listed in Supplementary File 2 and shown in Supplementary Fig. 5e.

File Name: Supplementary Data 4

Description: This file contains the deletions in S and their frequencies shown in Supplementary Fig. 5e.
